# Supplementary material for: Solvothermal Fabrication of Mesoporous Pd Nano-Corals at Mild Temperature for Alkaline Hydrogen Evolution Reaction
Source: MDPI journal article supplement (doi:10.3390/nano14100876), 2024-05-17
Supplement: s1 [file s1]

Supplementary Information

# Solvothermal Fabrication of Mesoporous Pd Nano-Corals at Mild Temperature for Alkaline Hydrogen Evolution Reaction

Ming Zhao <sup>1,\*</sup>, Koh-ichi Maruyama <sup>1</sup> and Satoshi Tanaka <sup>2</sup>

<sup>1</sup> Department of Materials and Biology, National Institute of Technology, Akita College, 1-1 Iijimabunkyocho, Akita 011-8511, Akita, Japan; maruko@akita-nct.ac.jp

<sup>2</sup> Department of Materials Science and Technology, Nagaoka University of Technology, 1603-1 Kamitomioka, Nagaoka 252-1123, Niigata, Japan; stanaka@vos.nagaokaut.ac.jp

\* Correspondence: mingzhao@akita-nct.ac.jp

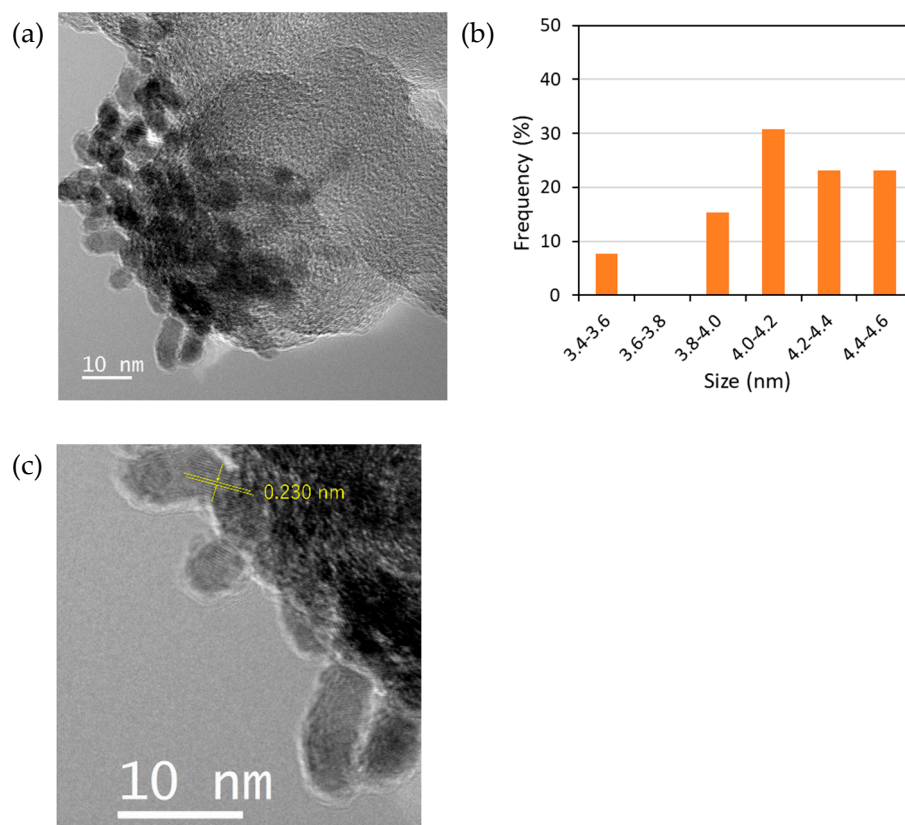

**Figure S1.** HRTEM image (a), ligament size distribution information based on Figure S1a (b), and a magnified HRTEM image marked with a lattice distance (c) of Pd NC(air).

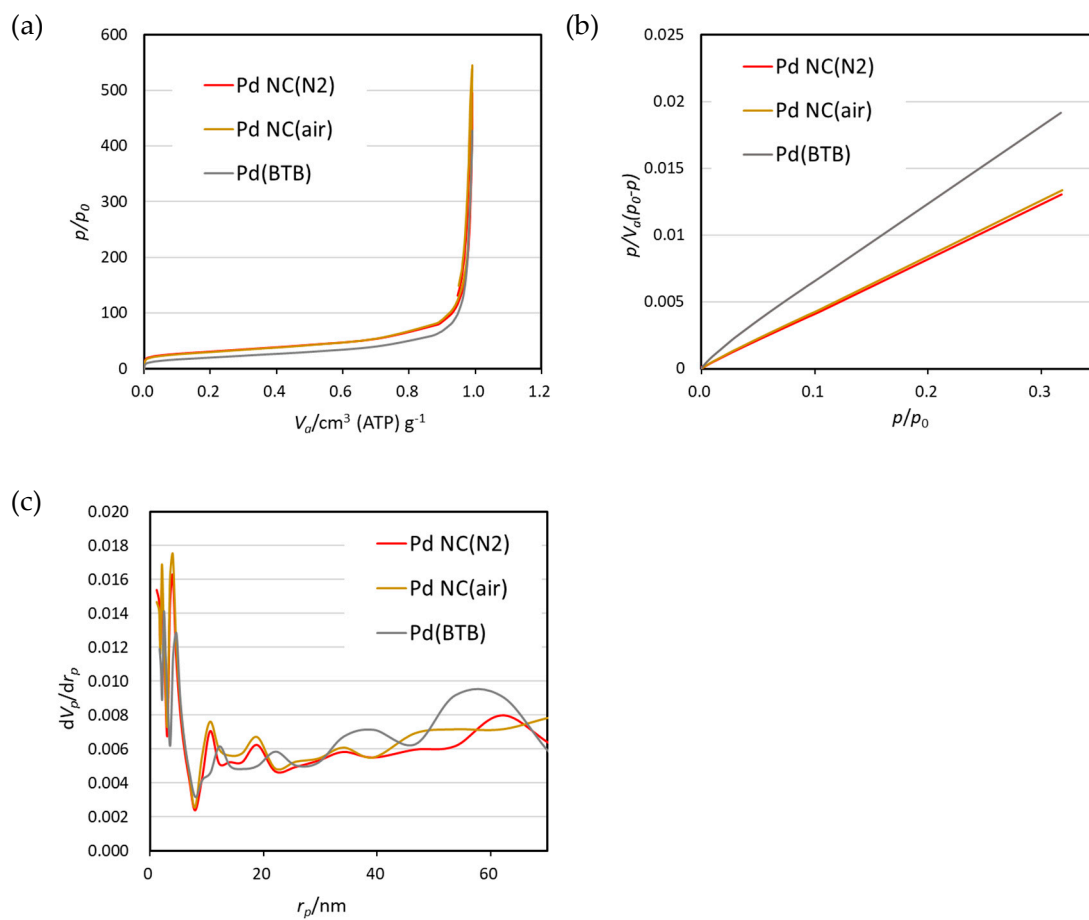

**Figure S2.** (a) Adsorption/desorption isotherm of the Pd-based materials. ATP stands for standard temperature and pressure; (b) BET plots; (c) Pore size distribution analysis based on the Barrett-Joyner-Halenda (BJH) method.

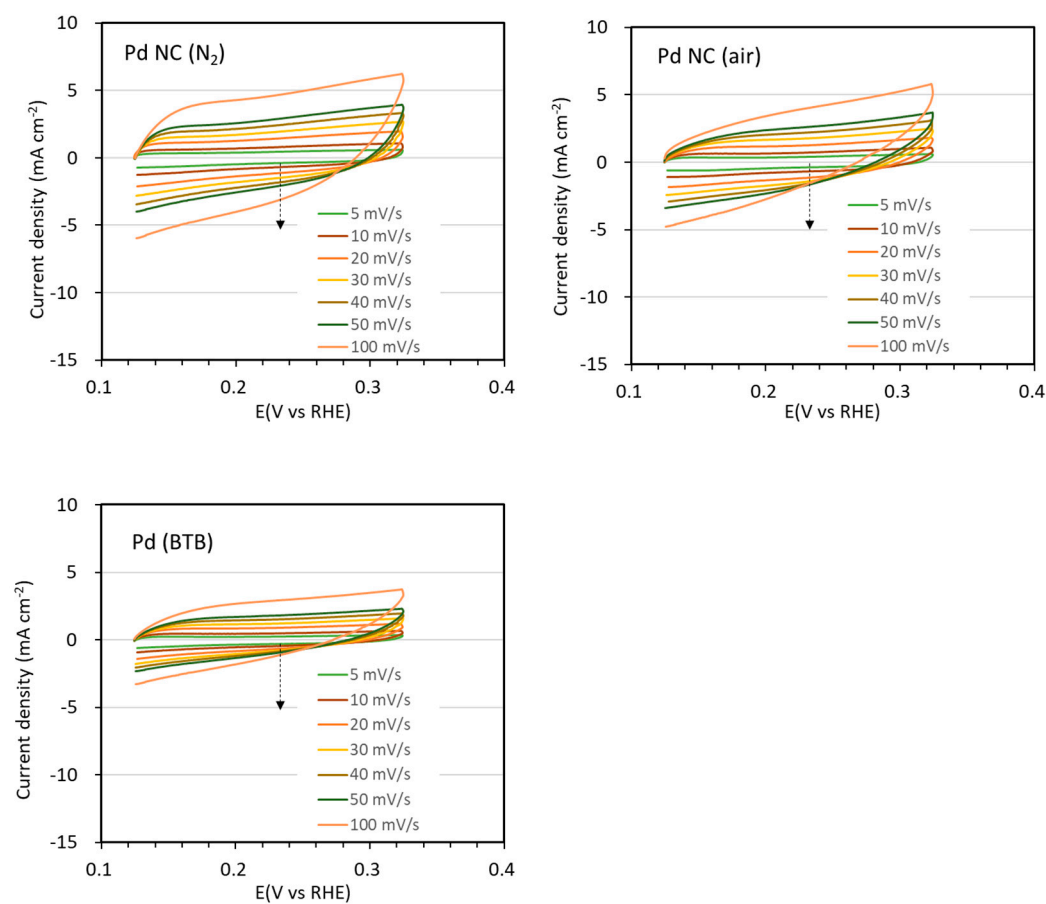

**Figure S3.** Electrochemical double-layer capacitance ( $C_{dl}$ ) measurement of different electrocatalysts.
